# Supplementary material for: Effect of marker position and size on the registration accuracy of HoloLens in a non-clinical setting with implications for high-precision surgical tasks
Source: PubMed Central journal article supplement (PMC8166698; doi:10.1007/s11548-021-02354-9), 2021-04-15
Supplement: 11548_2021_2354_MOESM4_ESM.pdf [file 11548_2021_2354_MOESM4_ESM.pdf]

## Online Resource 12

**Table S6** Mean errors for all dependant variables including 8x8 and 12x12 cm markers

|                          |          | Marker size | N    | Min   | Max  | Mean | SD  |
|--------------------------|----------|-------------|------|-------|------|------|-----|
| Inclination angle (°)    |          | 8           | 486  | 0     | 13.6 | 4.6  | 3.1 |
|                          |          | 12          | 486  | 0     | 8.7  | 3.7  | 2.4 |
| Distance-to-monitor (mm) |          | 8           | 486  | 0     | 32.9 | 12.0 | 8.3 |
|                          |          | 12          | 486  | 0     | 27.7 | 9.6  | 6.5 |
| Vertex position (mm)     |          | 8           | 2916 | 0     | 14.8 | 2.6  | 2.6 |
|                          |          | 12          | 2916 | 0     | 9.0  | 1.6  | 1.3 |
| Centroid position (mm)   |          | 8           | 486  | 0     | 9.0  | 2.2  | 2.1 |
|                          |          | 12          | 486  | 0     | 4.7  | 1.2  | 0.9 |
| Area (%)                 | Absolute | 8           | 486  | 0     | 15.5 | 3.7  | 3.8 |
|                          |          | 12          | 486  | 0     | 9.8  | 2.4  | 1.9 |
|                          | Relative | 8           | 486  | -15.5 | 5.8  | -1.9 | 5   |
|                          |          | 12          | 486  | -9.8  | 5.5  | 0.2  | 3   |

**Title:** Effect of marker position and size on the registration accuracy of HoloLens in a non-clinical setting with implications for high-precision surgical tasks

**Journal:** International Journal of Computer Assisted Radiology and Surgery

**Authors:** Laura Pérez-Pachón<sup>1</sup>, Parivrudh Sharma<sup>1</sup>, Helena Brech<sup>1</sup>, Jenny Gregory<sup>1</sup>, Terry Lowe<sup>1,3</sup>, Matthieu Poyade<sup>2</sup>, Flora Gröning<sup>1</sup>

<sup>1</sup> School of Medicine, Medical Sciences and Nutrition, University of Aberdeen, Aberdeen, United Kingdom

<sup>2</sup> School of Simulation and Visualisation, Glasgow School of Art, Glasgow, United Kingdom

<sup>3</sup> Head and Neck Oncology Unit, Aberdeen Royal Infirmary (NHS Grampian), Aberdeen, United Kingdom

**Corresponding author:** [laura.perezpachon@gmail.com](mailto:laura.perezpachon@gmail.com) (LP)
