# Supplementary material for: Effect of marker position and size on the registration accuracy of HoloLens in a non-clinical setting with implications for high-precision surgical tasks
Source: PubMed Central journal article supplement (PMC8166698; doi:10.1007/s11548-021-02354-9), 2021-04-15
Supplement: 11548_2021_2354_MOESM5_ESM.pdf [file 11548_2021_2354_MOESM5_ESM.pdf]

## Online Resource 13

**Table S7** Mean errors for all dependant variables including 4x4, 8x8 and 12x12 cm markers and marker position 9

|                          | Marker size | N   | Min | Max  | Mean | SD   |     |
|--------------------------|-------------|-----|-----|------|------|------|-----|
| Inclination angle (°)    | 4           | 54  | 2.3 | 6.3  | 3.7  | 0.9  |     |
|                          | 8           | 54  | 0.3 | 3.3  | 1.3  | 0.9  |     |
|                          | 12          | 54  | 0   | 2.6  | 1.2  | 0.7  |     |
| Distance-to-monitor (mm) | 4           | 54  | 1.4 | 6.7  | 4.0  | 1.4  |     |
|                          | 8           | 54  | 6.0 | 16.6 | 10.2 | 3.2  |     |
|                          | 12          | 54  | 9.6 | 15.8 | 11.8 | 1.9  |     |
| Vertex position (mm)     | 4           | 324 | 0.0 | 5.7  | 1.3  | 0.8  |     |
|                          | 8           | 324 | 0   | 1.7  | 0.7  | 0.4  |     |
|                          | 12          | 324 | 0.1 | 2.0  | 0.9  | 0.4  |     |
| Centroid position (mm)   | 4           | 54  | 0.1 | 2.6  | 1.2  | 0.7  |     |
|                          | 8           | 54  | 0   | 0.7  | 0.3  | 0.2  |     |
|                          | 12          | 54  | 0   | 0.8  | 0.5  | 0.2  |     |
| Area (%)                 | Absolute    | 4   | 54  | 0    | 3.6  | 1.2  | 0.9 |
|                          |             | 8   | 54  | 0    | 3.3  | 1.4  | 0.9 |
|                          |             | 12  | 54  | 0.6  | 4.7  | 2.0  | 0.9 |
|                          | Relative    | 4   | 54  | -3.6 | 1.0  | -1.1 | 1.1 |
|                          |             | 8   | 54  | -0.6 | 3.3  | 1.3  | 0.9 |
|                          |             | 12  | 54  | 0.6  | 4.7  | 2.0  | 0.9 |

**Title:** Effect of marker position and size on the registration accuracy of HoloLens in a non-clinical setting with implications for high-precision surgical tasks

**Journal:** International Journal of Computer Assisted Radiology and Surgery

**Authors:** Laura Pérez-Pachón<sup>1</sup>, Parivrudh Sharma<sup>1</sup>, Helena Brech<sup>1</sup>, Jenny Gregory<sup>1</sup>, Terry Lowe<sup>1,3</sup>, Matthieu Poyade<sup>2</sup>, Flora Gröning<sup>1</sup>

<sup>1</sup> School of Medicine, Medical Sciences and Nutrition, University of Aberdeen, Aberdeen, United Kingdom

<sup>2</sup> School of Simulation and Visualisation, Glasgow School of Art, Glasgow, United Kingdom

<sup>3</sup> Head and Neck Oncology Unit, Aberdeen Royal Infirmary (NHS Grampian), Aberdeen, United Kingdom

**Corresponding author:** [laura.perezpachon@gmail.com](mailto:laura.perezpachon@gmail.com) (LP)
