# Supplementary material for: Effect of marker position and size on the registration accuracy of HoloLens in a non-clinical setting with implications for high-precision surgical tasks
Source: PubMed Central journal article supplement (PMC8166698; doi:10.1007/s11548-021-02354-9), 2021-04-15
Supplement: 11548_2021_2354_MOESM7_ESM.pdf [file 11548_2021_2354_MOESM7_ESM.pdf]

### Online Resource 3

**Table S1** Intra-class correlation coefficient of researchers 1-3 in the measurements of the vertex alignment, inclination angle and distance-to-monitor extracted from the photos

|                     | Researcher | ICC   |
|---------------------|------------|-------|
| Inclination angle   | 1          | 0.979 |
|                     | 2          | 0.979 |
|                     | 3          | 0.953 |
| Distance-to-monitor | 1          | 0.994 |
|                     | 2          | 0.989 |
|                     | 3          | 0.975 |
| Vertex position     | 1          | 0.998 |
|                     | 2          | 0.995 |
|                     | 3          | 0.956 |

**Title:** Effect of marker position and size on the registration accuracy of HoloLens in a non-clinical setting with implications for high-precision surgical tasks

**Journal:** International Journal of Computer Assisted Radiology and Surgery

**Authors:** Laura Pérez-Pachón<sup>1</sup>, Parivrudh Sharma<sup>1</sup>, Helena Brech<sup>1</sup>, Jenny Gregory<sup>1</sup>, Terry Lowe<sup>1,3</sup>, Matthieu Poyade<sup>2</sup>, Flora Gröning<sup>1</sup>

<sup>1</sup> School of Medicine, Medical Sciences and Nutrition, University of Aberdeen, Aberdeen, United Kingdom

<sup>2</sup> School of Simulation and Visualisation, Glasgow School of Art, Glasgow, United Kingdom

<sup>3</sup> Head and Neck Oncology Unit, Aberdeen Royal Infirmary (NHS Grampian), Aberdeen, United Kingdom

**Corresponding author:** [laura.perezpachon@gmail.com](mailto:laura.perezpachon@gmail.com) (LP)
