# Supplementary material for: Effect of marker position and size on the registration accuracy of HoloLens in a non-clinical setting with implications for high-precision surgical tasks
Source: PubMed Central journal article supplement (PMC8166698; doi:10.1007/s11548-021-02354-9), 2021-04-15
Supplement: 11548_2021_2354_MOESM9_ESM.pdf [file 11548_2021_2354_MOESM9_ESM.pdf]

## Online Resource 5

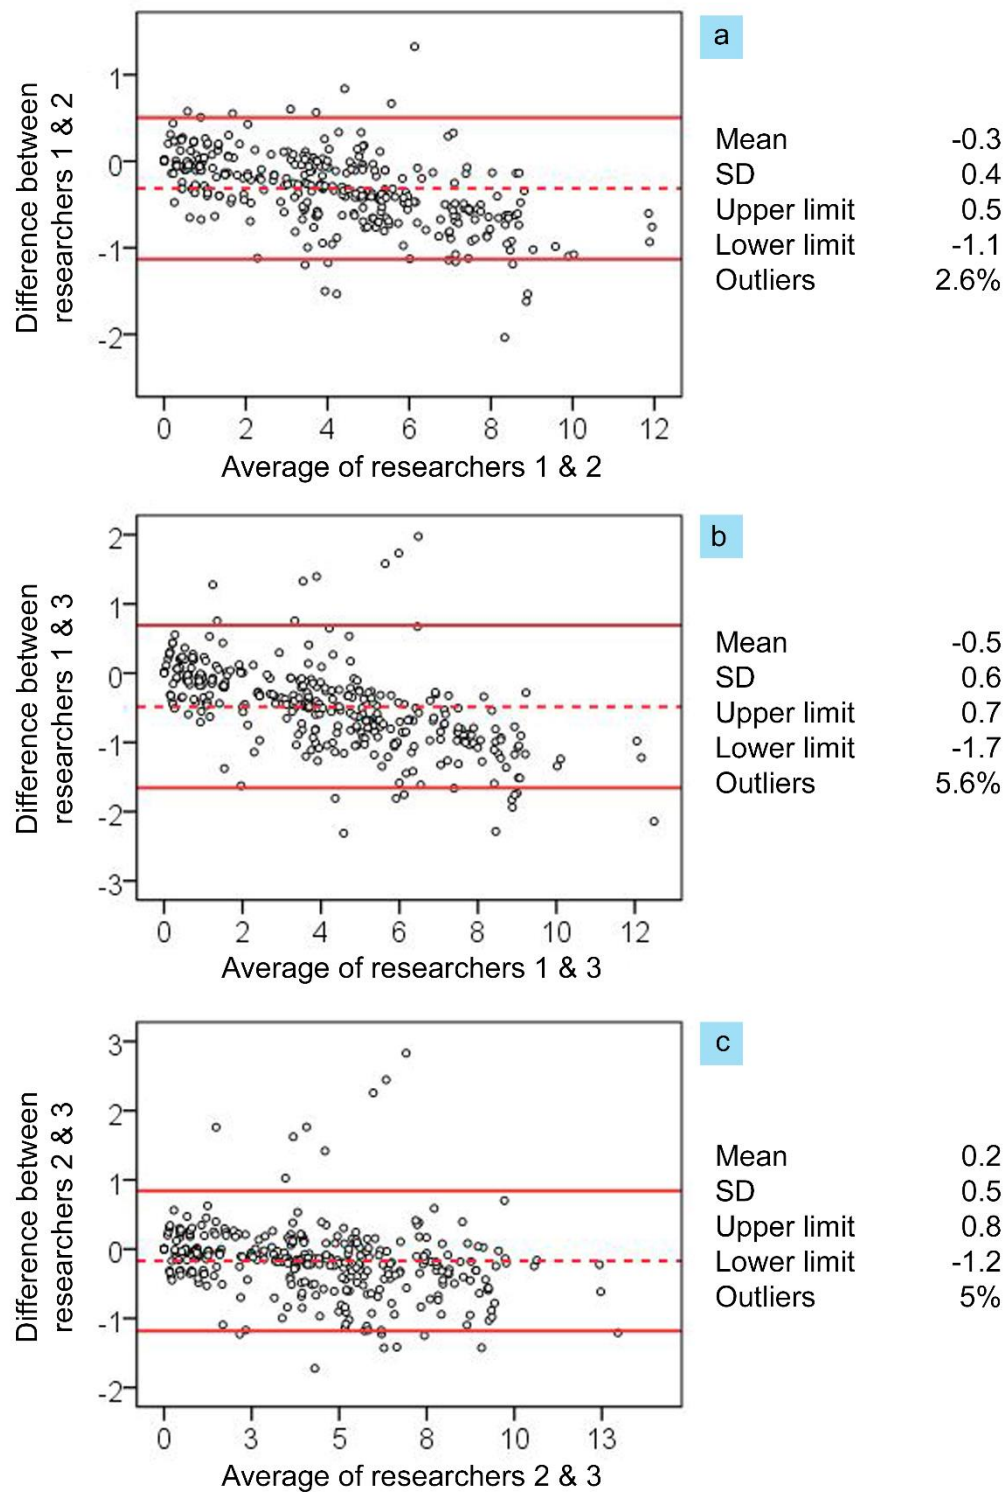

**Fig. S4** Inter-observer error in the measurement of inclination angle for researchers 1 and 2 (a), 1 and 3 (b), and 2 and 3 (c)

**Title:** Effect of marker position and size on the registration accuracy of HoloLens in a non-clinical setting with implications for high-precision surgical tasks

**Journal:** International Journal of Computer Assisted Radiology and Surgery

**Authors:** Laura Pérez-Pachón<sup>1</sup>, Parivrudh Sharma<sup>1</sup>, Helena Brech<sup>1</sup>, Jenny Gregory<sup>1</sup>, Terry Lowe<sup>1,3</sup>, Matthieu Poyade<sup>2</sup>, Flora Gröning<sup>1</sup>

<sup>1</sup> School of Medicine, Medical Sciences and Nutrition, University of Aberdeen, Aberdeen, United Kingdom

<sup>2</sup> School of Simulation and Visualisation, Glasgow School of Art, Glasgow, United Kingdom

<sup>3</sup> Head and Neck Oncology Unit, Aberdeen Royal Infirmary (NHS Grampian), Aberdeen, United Kingdom

**Corresponding author:** [laura.perezpachon@gmail.com](mailto:laura.perezpachon@gmail.com) (LP)
