# Supplementary material for: Effect of marker position and size on the registration accuracy of HoloLens in a non-clinical setting with implications for high-precision surgical tasks
Source: PubMed Central journal article supplement (PMC8166698; doi:10.1007/s11548-021-02354-9), 2021-04-15
Supplement: 11548_2021_2354_MOESM11_ESM.pdf [file 11548_2021_2354_MOESM11_ESM.pdf]

## Online Resource 7

**Table S2** Strong outliers for each dependant variable including their percentage and lower and upper ranges

|                          | Lower range |       | Upper range |      | Percentage | N    |    |
|--------------------------|-------------|-------|-------------|------|------------|------|----|
|                          | Min         | Max   | Min         | Max  |            |      |    |
| Inclination angle (°)    | -           | -     | 18.8        | -    | 0%         | 0    |    |
| Distance-to-monitor (mm) | -           | -     | 22.1        | 9    | 10.1%      | 98   |    |
| Vertex position (mm)     | -           | -     | 4.4         | 14.8 | 10.2%      | 592  |    |
| Centroid position (mm)   | -           | -     | 3.5         | 9    | 12.6%      | 122  |    |
| Area (%)                 | Absolute    | -     | -           | 12.5 | 15.5       | 1.3% | 13 |
|                          | Relative    | -15.5 | -14.9       | 14.5 | -15.1      | 0.5% | 5  |

**Title:** Effect of marker position and size on the registration accuracy of HoloLens in a non-clinical setting with implications for high-precision surgical tasks

**Journal:** International Journal of Computer Assisted Radiology and Surgery

**Authors:** Laura Pérez-Pachón<sup>1</sup>, Parivrudh Sharma<sup>1</sup>, Helena Brech<sup>1</sup>, Jenny Gregory<sup>1</sup>, Terry Lowe<sup>1,3</sup>, Matthieu Poyade<sup>2</sup>, Flora Gröning<sup>1</sup>

<sup>1</sup> School of Medicine, Medical Sciences and Nutrition, University of Aberdeen, Aberdeen, United Kingdom

<sup>2</sup> School of Simulation and Visualisation, Glasgow School of Art, Glasgow, United Kingdom

<sup>3</sup> Head and Neck Oncology Unit, Aberdeen Royal Infirmary (NHS Grampian), Aberdeen, United Kingdom

**Corresponding author:** [laura.perezpachon@gmail.com](mailto:laura.perezpachon@gmail.com) (LP)
