# Supplementary material for: Effect of marker position and size on the registration accuracy of HoloLens in a non-clinical setting with implications for high-precision surgical tasks
Source: PubMed Central journal article supplement (PMC8166698; doi:10.1007/s11548-021-02354-9), 2021-04-15
Supplement: 11548_2021_2354_MOESM13_ESM.pdf [file 11548_2021_2354_MOESM13_ESM.pdf]

## Online Resource 9

**Table S3** Correlation of inclination angle and distance-to-monitor errors with vertex and centroid position and area errors

|                   | Inclination angle | Distance-to-monitor |
|-------------------|-------------------|---------------------|
| Vertex position   | 0.272*            | 0.441*              |
| Centroid position | 0.348*            | 0.473*              |
| Area              | 0.214*            | 0.612*              |

<sup>a</sup>All marker positions (1-9) and 8x8 and 12x12 cm markers included ( $n = 972$ )

\*All correlations were significant at the 0.01 level (2-tailed)

**Title:** Effect of marker position and size on the registration accuracy of HoloLens in a non-clinical setting with implications for high-precision surgical tasks

**Journal:** International Journal of Computer Assisted Radiology and Surgery

**Authors:** Laura Pérez-Pachón<sup>1</sup>, Parivrudh Sharma<sup>1</sup>, Helena Brech<sup>1</sup>, Jenny Gregory<sup>1</sup>, Terry Lowe<sup>1,3</sup>, Matthieu Poyade<sup>2</sup>, Flora Gröning<sup>1</sup>

<sup>1</sup> School of Medicine, Medical Sciences and Nutrition, University of Aberdeen, Aberdeen, United Kingdom

<sup>2</sup> School of Simulation and Visualisation, Glasgow School of Art, Glasgow, United Kingdom

<sup>3</sup> Head and Neck Oncology Unit, Aberdeen Royal Infirmary (NHS Grampian), Aberdeen, United Kingdom

**Corresponding author:** [laura.perezpachon@gmail.com](mailto:laura.perezpachon@gmail.com) (LP)
